# Supplementary material for: Longitudinal Multi-omics and Microbiome Meta-analysis Identify an Asymptomatic Gingival State That Links Gingivitis, Periodontitis, and Aging
Source: mBio. 2021 Mar 9;12(2):e03281-20. doi: 10.1128/mBio.03281-20 (PMC8092283; doi:10.1128/mBio.03281-20)

disease\_dataset

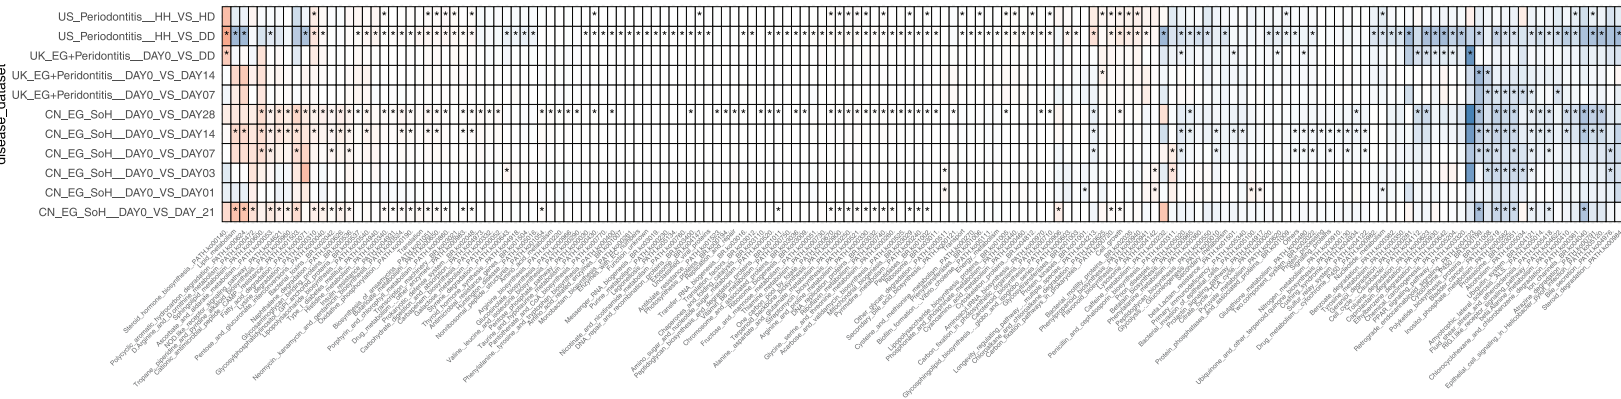

Imputed functions (level-3 KEGG pathway)

### Taxonomy (species level)

---

Imputed functions (level-3 KEGG pathway)

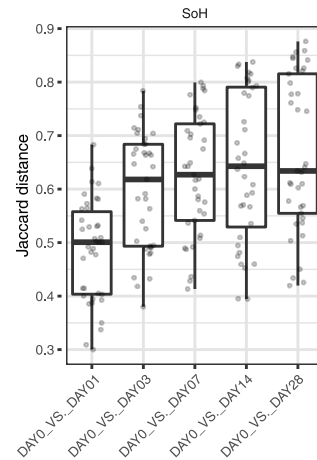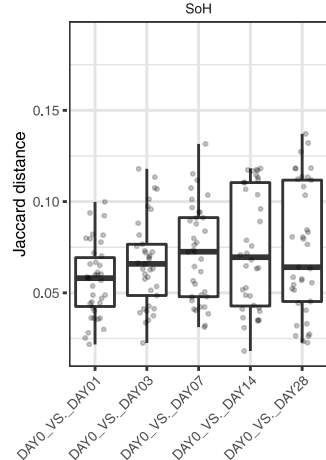

Supplement: FIG S5 [file mBio.03281-20-sf005.pdf]
