# Supplementary material for: Longitudinal Multi-omics and Microbiome Meta-analysis Identify an Asymptomatic Gingival State That Links Gingivitis, Periodontitis, and Aging
Source: PubMed Central journal article supplement (PMC8092283; doi:10.1128/mbio.03281-20), 2021-03-09

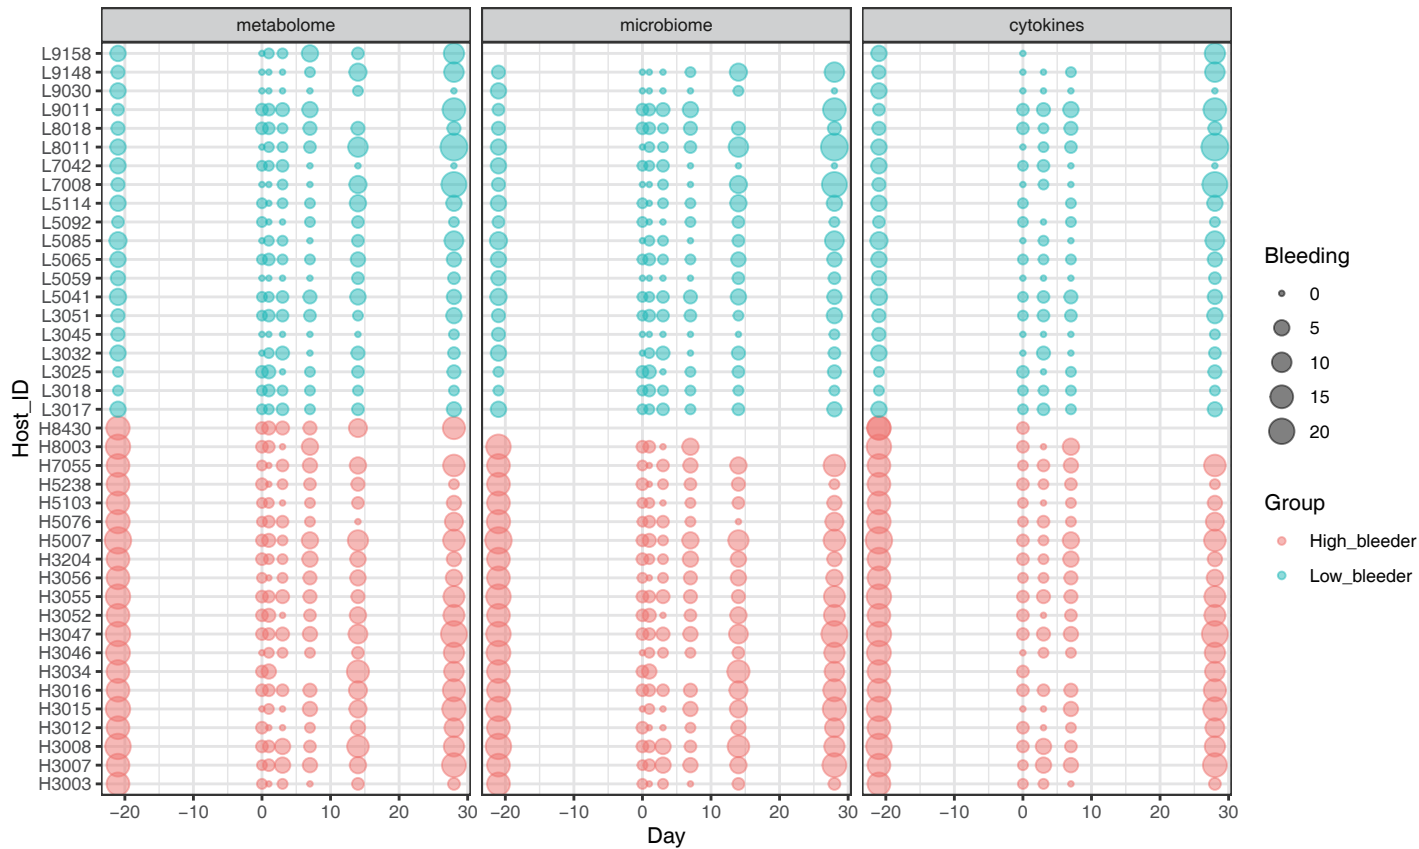

Supplement: mBio.03281-20-sf001.pdf [file mBio.03281-20-sf001.pdf]
