# Supplementary material for: Longitudinal Multi-omics and Microbiome Meta-analysis Identify an Asymptomatic Gingival State That Links Gingivitis, Periodontitis, and Aging
Source: PubMed Central journal article supplement (PMC8092283; doi:10.1128/mbio.03281-20), 2021-03-09
Supplement: mBio.03281-20-st001.pdf [file mBio.03281-20-st001.pdf]

1 **Table. S1. Clinical study design.** This is a single-leg, examiner-blind and randomized clinical  
 2 study. Forty healthy adult volunteers who meet the inclusion criteria were recruited for this study.  
 3 The procedures taken at each time points along 48-day NG-Baseline-EG process were highlighted  
 4 via ‘X’ below. See **Methods** and **Fig. 1a** for additional details.

5

| PHASE                         | ORAL HYGIENE |         |        | INDUCED GINGIVITIS |       |       |       |        |        | RECOVERY  |
|-------------------------------|--------------|---------|--------|--------------------|-------|-------|-------|--------|--------|-----------|
|                               | DAY -21      | DAY -14 | DAY -7 | DAY 0              | DAY 1 | DAY 3 | DAY 7 | DAY 14 | DAY 28 | FOLLOW-UP |
| INFORMED CONSENT              | X            |         |        |                    |       |       |       |        |        |           |
| MEDICAL HISTORY               | X            |         |        |                    |       |       |       |        |        |           |
| DEMOGRAPHICS                  | X            |         |        |                    |       |       |       |        |        |           |
| INCLUSION/EXCLUSION           | X            |         |        |                    |       |       |       |        |        |           |
| CONTINUANCE CRITERIA          |              | X       | X      | X                  | X     | X     | X     | X      | X      |           |
| SALIVA                        | X            |         |        | X                  | X     | X     | X     | X      | X      | X         |
| PERIODONTAL EXAMINATION       | X            |         |        |                    |       |       |       |        |        |           |
| MAZZA GINGIVAL INDEX          | X            | X       | X      | X                  | x     | x     | X     | X      | X      | X         |
| GINGIVAL PLAQUE COLLECTION    | X            |         |        | X                  | X     | X     | X     | X      | X      |           |
| DENTAL PROPHYLAXIS            | X            | X       | X      |                    |       |       |       |        |        |           |
| TOOTH POLISHING               | X            |         | X      |                    |       |       |       |        |        | X         |
| DAILY SUPERVISED ORAL HYGIENE | X            | X       | X      | X                  | X     | X     | X     | X      |        | X         |
| ADVERSE EVENT RECORDING       | X            | X       | X      | X                  | X     | X     | X     | X      | X      |           |
| SUBJECT ACCOUNTABILITY        |              |         |        |                    |       |       |       |        | X      |           |

6
