# Supplementary material for: Longitudinal Multi-omics and Microbiome Meta-analysis Identify an Asymptomatic Gingival State That Links Gingivitis, Periodontitis, and Aging
Source: PubMed Central journal article supplement (PMC8092283; doi:10.1128/mbio.03281-20), 2021-03-09
Supplement: mBio.03281-20-st002.pdf [file mBio.03281-20-st002.pdf]

1 **Table S2. Overview of the 40-individual cohort that underwent the controlled oral hygiene**  
 2 **regimen. (a)** Overview of the cohort. **(b)** Background information on each subject that  
 3 participated in the cohort.  
 4

| Demographic/Statistic Category                                                                                                                                                                                                                                                                                               | High_bleeder (n=20) | Low bleeder (n=20) | Overall (n=40) | p-value            |
|------------------------------------------------------------------------------------------------------------------------------------------------------------------------------------------------------------------------------------------------------------------------------------------------------------------------------|---------------------|--------------------|----------------|--------------------|
| <b>Age (Years)</b>                                                                                                                                                                                                                                                                                                           |                     |                    |                |                    |
| Mean (SD)                                                                                                                                                                                                                                                                                                                    | 33.60 (6.52)        | 37.65 (9.44)       | 35.63 (8.27)   | 0.123 <sup>a</sup> |
| Min.-Max.                                                                                                                                                                                                                                                                                                                    | 23 - 52             | 22 - 53            | 22 - 53        |                    |
| <b>Gender</b>                                                                                                                                                                                                                                                                                                                |                     |                    |                |                    |
| Female <sup>b</sup>                                                                                                                                                                                                                                                                                                          | 16 (80%)            | 16 (80%)           | 32 (80%)       | 1.000 <sup>c</sup> |
| Male <sup>b</sup>                                                                                                                                                                                                                                                                                                            | 4 (20%)             | 4 (20%)            | 8 (20%)        |                    |
| <b>Smoking</b>                                                                                                                                                                                                                                                                                                               |                     |                    |                |                    |
| Yes <sup>b</sup>                                                                                                                                                                                                                                                                                                             | 2 (10%)             | 2 (10%)            | 4 (10%)        | 1.000 <sup>c</sup> |
| No <sup>b</sup>                                                                                                                                                                                                                                                                                                              | 18 (90%)            | 18 (90%)           | 36 (90%)       |                    |
| <sup>a</sup> Two-sided ANOVA <i>p</i> -value for the treatment comparison.<br><sup>b</sup> The number (percent) of subjects in each category.<br><sup>c</sup> Two-sided chi-square <i>p</i> -value for the treatment comparison.<br><sup>d</sup> Two-sided Fisher's exact test <i>p</i> -value for the treatment comparison. |                     |                    |                |                    |

5

| Host_ID | Group        | Age | Gender | Smoking |
|---------|--------------|-----|--------|---------|
| 3003    | High_bleeder | 38  | F      | N       |
| 3007    | High_bleeder | 37  | F      | N       |
| 3008    | High_bleeder | 29  | F      | N       |
| 3012    | High_bleeder | 30  | F      | N       |
| 3015    | High_bleeder | 33  | F      | N       |
| 3016    | High_bleeder | 30  | F      | N       |
| 3017    | Low_bleeder  | 28  | F      | N       |
| 3018    | Low_bleeder  | 22  | F      | N       |
| 3025    | Low_bleeder  | 41  | F      | N       |
| 3032    | Low_bleeder  | 53  | F      | N       |
| 3034    | High_bleeder | 52  | F      | N       |
| 3045    | Low_bleeder  | 46  | M      | N       |
| 3046    | High_bleeder | 31  | M      | Y       |
| 3047    | High_bleeder | 31  | F      | N       |
| 3051    | Low_bleeder  | 36  | F      | N       |
| 3052    | High_bleeder | 37  | M      | N       |
| 3055    | High_bleeder | 34  | M      | N       |

|      |              |    |   |   |
|------|--------------|----|---|---|
| 3056 | High_bleeder | 28 | F | N |
| 3204 | High_bleeder | 23 | F | N |
| 5007 | High_bleeder | 36 | F | N |
| 5041 | Low_bleeder  | 41 | F | N |
| 5059 | Low_bleeder  | 47 | F | N |
| 5065 | Low_bleeder  | 31 | F | N |
| 5076 | High_bleeder | 33 | F | N |
| 5085 | Low_bleeder  | 49 | F | N |
| 5092 | Low_bleeder  | 31 | M | Y |
| 5103 | High_bleeder | 31 | F | N |
| 5114 | Low_bleeder  | 31 | F | N |
| 5238 | High_bleeder | 47 | F | N |
| 7008 | Low_bleeder  | 46 | F | N |
| 7042 | Low_bleeder  | 47 | F | N |
| 7055 | High_bleeder | 30 | F | N |
| 8003 | High_bleeder | 30 | M | Y |
| 8011 | Low_bleeder  | 30 | F | N |
| 8018 | Low_bleeder  | 23 | M | N |
| 8430 | High_bleeder | 32 | F | N |
| 9011 | Low_bleeder  | 29 | M | Y |
| 9030 | Low_bleeder  | 31 | F | N |
| 9148 | Low_bleeder  | 47 | F | N |
| 9158 | Low_bleeder  | 44 | F | N |

6  
7
